# Supplementary material for: A systematic investigation of the maximum tolerated dose of cytotoxic chemotherapy with and without supportive care in mice
Source: Springer Nature journal article supplement (doi:10.1186/s12885-017-3677-7), 2017-10-16
Supplement: MOESM1 [file 15138522]

## **ADDITIONAL FILE**

### **A Systematic Investigation of the Maximum Tolerated Dose of Cytotoxic Chemotherapy with and without Supportive Care in Mice**

Wayne J. Aston<sup>1,2</sup>, Danika E. Hope<sup>1,2</sup>, Anna K. Nowak<sup>1,2,3</sup>, Bruce W. Robinson<sup>1,2</sup>, Richard A. Lake<sup>1,2</sup>, W. Joost Lesterhuis<sup>1,2\*</sup>

<sup>1</sup>National Centre for Asbestos Related Diseases, <sup>2</sup>Faculty of Health and Medical Sciences, The University of Western Australia, Nedlands WA 6009, Australia.

<sup>3</sup>Department of Medical Oncology, Sir Charles Gairdner Hospital, Nedlands, WA, 6009, Australia.

**Key words:** chemotherapy, mice, dose optimization, maximum tolerated dose, MTD, supportive care, cancer.

**Short title:** cytotoxic chemotherapy dose optimization in mice

**\*Corresponding author:** W. Joost Lesterhuis, National Centre for Asbestos Related Diseases, Faculty of Health and Medical Sciences, University of Western Australia, 5th Floor, QQ Block, 6 Verdun Street, Nedlands WA 6009, Australia; Phone: (+61) 8 6151 0895, Fax: (+61) 8 6151 1027; Email: willem.lesterhuis@uwa.edu.au

| Score      |                     | 0             | 1                       | 2                                 |
|------------|---------------------|---------------|-------------------------|-----------------------------------|
| Appearance | Weight loss         | Steady weight | > 10% weight loss       | 15%-19.9% weight loss             |
|            | Coat                | Normal        | Mild ruffled coat       | Moderate ruffled coat, ungroomed  |
|            | Body condition      | Normal        | Thin                    | Loss of body fat, failure to grow |
|            | Body Posture        | Normal        | Hunched                 | Hunched and still                 |
|            | Movement            | Normal        | Reduced/slow            | Reluctant to move when touched    |
| Activity   | Proximity to others | Close contact | Somewhat separate       | Completely separate               |
| Other      | Injection site      | Normal        | Some redness at margins | Redness and swelling              |

**Supplementary Table S1: Clinical Severity Score.** Parameters used for the clinical score determination of mice.

| <b>Chemotherapy</b> | <b>Supplier</b>                                              | <b>Diluent</b>      |
|---------------------|--------------------------------------------------------------|---------------------|
| 5-Fluorouracil      | Fluorouracil Ebewe, Sandoz PTY LTD, Pymont NSW Australia     | 0.9% NaCl           |
| Bleomycin           | DBL Bleomycin Sulfate, Hospira, Mulgrave VIC Australia       | Water for injection |
| Cisplatin           | DBL Cisplatin, Hospira, Mulgrave VIC Australia               | 0.9% NaCl           |
| Cyclophosphamide    | Endoxan, Baxter, Toongabbie NSW Australia                    | 0.9% NaCl           |
| Docetaxel           | Oncotaxel 80, Actavis, North Adelaide SA Australia           | 0.9% NaCl           |
| Doxorubicin         | Adriamycin, Pfizer, West Ryde NSW Australia                  | 0.9% NaCl           |
| Etoposide Phosphate | Etopophos, Bristol-Myers-Squibb, Mulgrave VIC Australia      | Water for injection |
| Gemcitabine         | DBL Gemcitabine, Hospira, Mulgrave VIC Australia             | 0.9% NaCl           |
| Irinotecan          | Irinotecan Actavis, Actavis, North Adelaide SA Australia     | 0.9% NaCl           |
| Vinorelbine         | Navelbine, Pierre Fabre Medicament, North Ryde NSW Australia | 0.9% NaCl           |

**Supplementary Table S2: Chemotherapeutics used in this study with corresponding supplier and diluent.**
